# Supplementary material
Source: Elsevier journal article supplement (https://www.sciencedirect.com/science/article/pii/S1578219017302512)
Supplement: mmc1 [file S1578219017302512:mmc1.pdf]

**Table** - Final Score Obtained by Each Reconstruction Technique in the Distinct Facial Cosmetic Subunits

|     | Central Forehead |    | Lateral Forehead  |    | Brow            |    |
|-----|------------------|----|-------------------|----|-----------------|----|
| 1st | Flag (H)         | 95 | Limberg           | 55 | Island          | 45 |
| 2nd | A-T              | 25 | Inferior rotation | 45 | Flag            | 35 |
| 3rd | O-Z              | 10 | A-T               | 25 | Simple rotation | 25 |
| 4th | Lobar            | 5  | O-Z               | 15 | A-T             | 25 |
| 5th | V-Y              | 5  | V-Y               | 5  | O-Z             | 10 |
| 6th |                  |    |                   |    | Limberg         | 5  |

|     | Dorsum of the Nose |    | Lateral Wall of the Nose |    | Nasal Ala              |    | Tip of the Nose |    |
|-----|--------------------|----|--------------------------|----|------------------------|----|-----------------|----|
| 1st | Rieger Glabellar   | 40 | Limberg                  | 50 | Nasolabial             | 45 | Bilobar         | 45 |
| 2nd | Limberg            | 30 | Lateral advancement      | 35 | Limberg                | 40 | Burow triangles | 35 |
| 3rd | A-T                | 25 | Bernard-Webster          | 15 | Simple-spiral rotation | 30 | Rieger          | 20 |
| 4th | Burow triangles    | 20 | Nasolabial               | 15 | Bilobar                | 20 | Limberg         | 20 |
| 5th | Bilobar            | 10 | Bilobar                  | 10 | Bernard-Webster        | 5  | Peng            | 10 |
| 6th | Bernard-           | 5  | Glabellar                | 5  | Island                 | 5  | Double Bernard- | 5  |

|     |         |   |                 |   |  |  |              |   |
|-----|---------|---|-----------------|---|--|--|--------------|---|
|     | Webster |   |                 |   |  |  | Webster      |   |
| 7th | O-Z     | 5 | Burow triangles | 5 |  |  | Mediofrontal | 5 |
| 8th | Peng    | 5 | Rotation        | 5 |  |  | Island       | 5 |

|     |                  |    |
|-----|------------------|----|
|     | <b>Columella</b> |    |
| 1st | Transposition    | 55 |
| 2nd | Burow triangles  | 50 |
| 2nd | Nasolabial       | 10 |
| 3rd | Island           | 10 |
| 4th | Z-plasty         | 10 |

|     |                                 |    |                                             |    |                        |    |                       |     |
|-----|---------------------------------|----|---------------------------------------------|----|------------------------|----|-----------------------|-----|
|     | <b>Upper Eyelid</b>             |    | <b>Lower Eyelid</b>                         |    | <b>Lateral Canthus</b> |    | <b>Medial Canthus</b> |     |
| 1st | Advancement<br>Lateral rotation | 40 | Lateral advancement<br>Canthotomy<br>Tenzel | 75 | Limberg                | 55 | Glabellar             | 100 |
| 2nd | Reverse Tripiet                 | 15 | Tripiet                                     | 35 | Lateral advancement    | 50 | Island                | 15  |
| 3rd | Reverse Tenzel                  | 10 | Imre                                        | 10 | M-plasty               | 20 | A-T                   | 15  |
| 4th | Limberg                         | 10 | A-T                                         | 10 | Mercedes               | 5  | Mercedes              | 5   |
| 5th | Cutler-Beard                    | 5  | V-Y                                         | 10 | Z-plasty               | 5  | Reverse Tripiet       | 5   |

|     |     |   |        |   |  |  |                     |   |
|-----|-----|---|--------|---|--|--|---------------------|---|
| 6th | A-T | 5 | Island | 5 |  |  | Trans-<br>position  | 5 |
| 7th | V-Y | 5 |        |   |  |  | Rotation<br>hatchet | 5 |

|     | <b>Infraorbital<br/>Cheek</b> |    | <b>Zygomatic<br/>Cheek</b> |    | <b>Buccal<br/>Cheek</b> |    | <b>Parotid-<br/>Masseteric<br/>Cheek</b> |    |
|-----|-------------------------------|----|----------------------------|----|-------------------------|----|------------------------------------------|----|
| 1st | Mustardé                      | 85 | Limberg                    | 70 | Limberg                 | 80 | Limberg                                  | 70 |
| 2nd | Blascovicz                    | 25 | Lateral<br>rotation        | 60 | Crescentic              | 25 | Lateral<br>rotation                      | 60 |
| 3rd | Limberg                       | 20 | M                          | 15 | Burow<br>triangles      | 15 |                                          |    |
| 4th | Island                        | 10 | A-T                        | 5  | Lateral<br>rotation     | 10 |                                          |    |
| 5th | A-T                           | 5  |                            |    | A-T                     | 5  |                                          |    |

|     | <b>Philtrum<br/>Upper Lip</b> |    | <b>Lateral<br/>Upper Lip</b> |    | <b>Vermillion<br/>Upper Lip<br/>(Full Thickness)</b> |    |
|-----|-------------------------------|----|------------------------------|----|------------------------------------------------------|----|
| 1st | A-T                           | 40 | Island                       | 75 | Bilateral perialar                                   | 70 |
| 2nd | Flag                          | 40 | A-T                          | 40 | Abbe                                                 | 10 |
| 3rd | Island                        | 30 | Bernard-<br>Webster          | 15 | Karapandzic<br>inverted                              | 5  |
| 4th | Perialar<br>crescentic        | 10 | Crescentic                   | 5  | A-T                                                  | 5  |

|     |                      |    |  |  |  |  |
|-----|----------------------|----|--|--|--|--|
| 5th | Burow triangles      | 10 |  |  |  |  |
| 6th | Double transposition | 10 |  |  |  |  |

|     | Central Lower Lip |    | Vermillion Lower Lip (Full Thickness) |    |
|-----|-------------------|----|---------------------------------------|----|
| 1st | A-T               | 30 | Double advancement (Turgut)           | 50 |
| 2nd | Flag              | 30 | Karapandzic                           | 30 |
| 3rd | M                 | 30 | Abbe                                  | 10 |
| 4th | Transposition     | 15 | Gillies                               | 10 |
| 5th |                   |    | W                                     | 10 |

|     | Chin          |    |
|-----|---------------|----|
| 1st | A-T           | 55 |
| 2nd | Rotation      | 40 |
| 2nd | Advancement   | 25 |
| 6th | Transposition | 15 |

|     | <b>Helix<br/>of the Ear</b> |    | <b>Antihelix<br/>of the Ear</b>       |    | <b>Concha<br/>of the Ear</b>        |    |
|-----|-----------------------------|----|---------------------------------------|----|-------------------------------------|----|
| 1st | Helical advancement         | 60 | Transposition                         | 30 | Revolving door                      | 85 |
| 2nd | Retroauricular advancement  | 15 | Rotation                              | 30 | Second intention                    | 30 |
| 3rd | Reduction plasty            | 15 | A-T                                   | 10 | Preauricular transposition          | 10 |
| 4th | Antia-Buch                  | 10 | Island                                | 10 | Tunneled reatrouricular advancement | 5  |
| 5th | Posterior rotation          | 5  | Revolving door                        | 10 |                                     |    |
| 6th | Island                      | 5  | Tunneled Preauricular                 | 10 |                                     |    |
| 7th |                             |    | Tunneled retroauricular transposition | 10 |                                     |    |
| 8th |                             |    | Tunneled retroauricular advancement   | 5  |                                     |    |
| 9th |                             |    | Reduction plasty                      | 5  |                                     |    |

|     | <b>Earlobe</b> |    | <b>Retroauricular</b> |    |
|-----|----------------|----|-----------------------|----|
| 1st | Transposition  | 45 | Transposition         | 45 |
| 2nd | Gavello        | 25 | Rotation              | 30 |
| 3rd | Advancement    | 20 | Advancement           | 30 |
| 4th | Rotation       | 10 | Island                | 10 |
| 5th | A-T            | 10 | Flag                  | 10 |
| 6th | Z              | 10 |                       |    |

|     | <b>Scalp</b>                            |    |
|-----|-----------------------------------------|----|
| 1st | Rotation/O-Z                            | 80 |
| 2nd | Transposition/<br>Triple Limberg        | 40 |
| 3rd | Second<br>intention                     | 10 |
| 4th | Mercedes with<br>Releasing<br>incisions | 5  |
| 5th | Releasing<br>incisions                  | 5  |
| 6th | Windmill                                | 5  |
